# Supplementary material for: Cu0.33@Co0.22Ni0.45 core–shell nanoparticles as hydrogen generation catalysts via hydrolysis of ammonia borane
Source: Royal Society of Chemistry journal article supplement (doi:10.1039/d1nj05959a), 2022-01-01
Supplement: d1nj05959a1.pdf [file d1nj05959a1.pdf]

**Title**  $\text{Cu}_{0.33}@\text{Co}_{0.22}\text{Ni}_{0.45}$  core-shell nanoparticles as hydrogen generation catalysts via hydrolysis of ammonia borane

*Wei Shang\**, *Xiaojing Yang\**, *Wanlu Sang*

**Table S1** The ratios of Cu/Co/Ni for  $\text{Cu}_{0.33}@\text{Co}_{0.22}\text{Ni}_{0.45}$  tested by ICP.

| Ratio of Cu/Co/Ni (mol/mol/mol) in preparation | Cu/Co/Ni (ppm) tested by ICP | Cu/Co/Ni (at %) tested by ICP |
|------------------------------------------------|------------------------------|-------------------------------|
| 2:1:1                                          | 42.75:26.55:54.39            | 0.33:0.22:0.45                |

**Table S2** Material constant and model size.

| Element    | Elastic modulus (GPa) | Poisson's ratio | Coefficient of linear expansion | Radius (nm) |
|------------|-----------------------|-----------------|---------------------------------|-------------|
| Core (Cu)  | 119                   | 0.326           | $18 \times 10^{-6}$             | 36          |
| Shell (Co) | 210                   | 0.320           | $12 \times 10^{-6}$             | 43          |
| Shell (Ni) | 207                   | 0.291           | $13 \times 10^{-6}$             | 50          |
